# Supplementary material for: Ag2Mo2O7: an oxide solid-state Ag+ electrolyte
Source: Royal Society of Chemistry journal article supplement (doi:10.1039/d1ra07097e), 2022-01-01

## checkCIF/PLATON report

You have not supplied any structure factors. As a result the full set of tests cannot be run.

THIS REPORT IS FOR GUIDANCE ONLY. IF USED AS PART OF A REVIEW PROCEDURE FOR PUBLICATION, IT SHOULD NOT REPLACE THE EXPERTISE OF AN EXPERIENCED CRYSTALLOGRAPHIC REFEREE.

No syntax errors found.      CIF dictionary      Interpreting this report

### Datablock: I

---

Bond precision:    Mo- O = 0.0225 A                      Wavelength=0.71073

Cell:              a=6.09721 (10)              b=7.50731 (16)              c=7.6779 (2)  
                    alpha=110.4285 (13)      beta=93.1670 (13)      gamma=113.5086 (14)

Temperature:    0 K

|                        | Calculated   | Reported     |
|------------------------|--------------|--------------|
| Volume                 | 294.172 (12) | 294.171 (12) |
| Space group            | P -1         | P-1          |
| Hall group             | -P 1         | ?            |
| Moiety formula         | Ag2 Mo2 O7   | ?            |
| Sum formula            | Ag2 Mo2 O7   | Ag2 Mo2 O7   |
| Mr                     | 519.62       | 519.62       |
| Dx, g cm <sup>-3</sup> | 5.866        | 0.000        |
| Z                      | 2            | 2            |
| Mu (mm <sup>-1</sup> ) | 10.706       | 0.000        |
| F000                   | 468.0        | 0.0          |
| F000'                  | 457.70       |              |
| h, k, lmax             |              |              |
| Nref                   |              |              |
| Tmin, Tmax             |              |              |
| Tmin'                  |              |              |

Correction method= Not given

Data completeness=                      Theta (max)=

R(reflections)=                                              wR2(reflections)=  
S =                                              Npar=

---

The following ALERTS were generated. Each ALERT has the format

**test-name\_ALERT\_alert-type\_alert-level.**

Click on the hyperlinks for more details of the test.

---

## Alert level A

EXPT001\_ALERT\_1\_A \_exptl\_crystal\_density\_diffn is missing  
Density calculated from unit cell and contents (Mg m<sup>-3</sup>).  
The following tests will not be performed.  
DENS01,DENSX\_01

DIFF001\_ALERT\_1\_A \_diffn\_radiation\_type is missing  
The radiation type should contain one of the following  
\* 'Cu K\alpha'  
\* 'Mo K\alpha'  
\* 'Ag K\alpha'  
\* neutron  
\* synchrotron  
The following tests will not be performed.  
ABSMU\_01,ABSTM\_02,CRYSS\_01,RADNW\_01

DIFF002\_ALERT\_1\_A \_diffn\_radiation\_wavelength is missing  
Radiation wavelength (Å).  
The following tests will not be performed.  
RADNW\_01,REFLT\_03,REFNR\_01,THETM\_01

CELL003\_ALERT\_1\_A \_cell\_measurement\_reflns\_used is missing  
Number of reflections used to measure unit cell.

CELL004\_ALERT\_1\_A \_cell\_measurement\_theta\_min is missing  
Minimum theta of reflections used to measure unit cell.  
The following tests will not be performed.  
CELLT\_01

CELL005\_ALERT\_1\_A \_cell\_measurement\_theta\_max is missing  
Maximum theta of reflections used to measure unit cell.  
The following tests will not be performed.  
CELLT\_01

CELL006\_ALERT\_1\_A \_cell\_measurement\_temperature is missing  
Measurement temperature (K).  
The following tests will not be performed.  
CELLK\_01

EXPT004\_ALERT\_1\_A \_exptl\_absorpt\_coefficient\_mu is missing  
Linear absorption coefficient (mm<sup>-1</sup>).  
The following tests will not be performed.  
ABSMU\_01,ABSTM\_02

EXPT005\_ALERT\_1\_A \_exptl\_crystal\_description is missing  
Crystal habit description.  
The following tests will not be performed.  
CRYSR\_01

EXPT009\_ALERT\_1\_A No crystal dimensions have been given.  
The following tests will not be performed.  
CRYSS\_01,CRYSS\_02

EXPT010\_ALERT\_1\_A \_exptl\_crystal\_colour (\_pd\_char\_colour for powder) is missing  
Crystal colour.  
The following tests will not be performed.  
CRYSC\_01

DIFF003\_ALERT\_1\_A \_diffn\_measurement\_device\_type is missing  
Diffractometer make and type. Replaces \_diffn\_measurement\_type.

DIFF005\_ALERT\_1\_A \_diffn\_measurement\_method is missing  
Mode of intensity measurement and scan.

DIFF007\_ALERT\_1\_A \_diffn\_reflns\_number is missing

Total number of reflections measured.  
The following tests will not be performed.  
REFLG\_01,REFLT\_01

REFL001\_ALERT\_1\_A \_reflns\_number\_total is missing  
Number of symmetry-independent reflections.  
The following tests will not be performed.  
REFLT\_01,REFLT\_02,REFLT\_03,REFNR\_01

REFL002\_ALERT\_1\_A \_reflns\_number\_gt is missing  
Number of reflections > sigma threshold.  
The following tests will not be performed.  
REFLG\_01,REFLT\_02

REFL004\_ALERT\_1\_A \_reflns\_threshold\_expression is missing  
Sigma expression for F, F2 or I threshold.  
The following tests will not be performed.  
REFLE\_01

DIFF008\_ALERT\_1\_A \_diffrn\_reflns\_theta\_max is missing  
Maximum theta of measured reflections.  
The following tests will not be performed  
REFLT\_03,REFNR\_01,THETM\_01

DIFF013\_ALERT\_1\_A \_diffrn\_reflns\_limit\_h\_min is missing  
Minimum h index of measured data.  
The following tests will not be performed  
REFLL\_01

DIFF014\_ALERT\_1\_A \_diffrn\_reflns\_limit\_h\_max is missing  
Maximum h index of measured data.  
The following tests will not be performed  
REFLL\_01

DIFF015\_ALERT\_1\_A \_diffrn\_reflns\_limit\_k\_min is missing  
Minimum k index of measured data.  
The following tests will not be performed  
REFLL\_01

DIFF016\_ALERT\_1\_A \_diffrn\_reflns\_limit\_k\_max is missing  
Maximum k index of measured data.  
The following tests will not be performed  
REFLL\_01

DIFF017\_ALERT\_1\_A \_diffrn\_reflns\_limit\_l\_min is missing  
Minimum l index of measured data.  
The following tests will not be performed  
REFLL\_01

DIFF018\_ALERT\_1\_A \_diffrn\_reflns\_limit\_l\_max is missing  
Maximum l index of measured data.  
The following tests will not be performed  
REFLL\_01

DIFF019\_ALERT\_1\_A \_diffrn\_standards\_number is missing  
Number of standards used in measurement.

DIFF020\_ALERT\_1\_A \_diffrn\_standards\_interval\_count and  
\_diffrn\_standards\_interval\_time are missing. Number of measurements  
between standards or time (min) between standards.

DIFF022\_ALERT\_1\_A \_diffrn\_standards\_decay\_% is missing  
Percentage decrease in standards intensity.

REFI001\_ALERT\_1\_A \_refine\_ls\_structure\_factor\_coef is missing  
The structure factor coefficient should be one of the following  
\* Inet  
\* Fsqd  
\* F  
The following tests will not be performed  
FCOEF\_01

REFI003\_ALERT\_1\_A \_refine\_ls\_R\_factor\_gt is missing  
R factor of F for reflections > threshold.  
The following tests will not be performed  
RFACG\_01

REFI005\_ALERT\_1\_A \_refine\_ls\_wR\_factor\_ref is missing  
R factor of coefficient for refinement reflections.  
The following tests will not be performed  
RFACR\_01

REFI007\_ALERT\_1\_A \_refine\_ls\_goodness\_of\_fit\_ref is missing  
Goodness of fit S for refinement reflections.  
The following tests will not be performed  
GOODF\_01

REFI009\_ALERT\_1\_A \_refine\_ls\_number\_reflns is missing  
Number of reflections used in refinement.  
The following test will not be performed  
REFNR\_01

REFI010\_ALERT\_1\_A \_refine\_ls\_number\_parameters is missing  
Number of parameters refined.  
The following tests will not be performed  
REFNR\_01

REFI011\_ALERT\_1\_A \_refine\_ls\_weighting\_scheme is missing  
The weighting scheme should be one of the following  
\* sigma  
\* calc  
The following tests will not be performed  
WEIGH\_01

REFI015\_ALERT\_1\_A \_refine\_ls\_shift/su\_max is missing  
Maximum shift/s.u. ratio after final refinement cycle.  
The following tests will not be performed  
SHFSU\_01

REFI017\_ALERT\_1\_A \_refine\_diff\_density\_max is missing  
Maximum value of final difference map (e A-3).  
The following tests will not be performed  
DIFMN\_01,DIFMX\_01,DIFMX\_02

REFI018\_ALERT\_1\_A \_refine\_diff\_density\_min is missing  
Minimum value of final difference map (e A-3).  
The following tests will not be performed  
DIFMN\_01,DIFMN\_02,DIFMN\_03

ATOM007\_ALERT\_1\_A \_atom\_site\_aniso\_label is missing  
Unique label identifying the atom site.

GEOM001\_ALERT\_1\_A \_geom\_bond\_atom\_site\_label\_1 is missing  
Label identifying the atom site 1.

GEOM002\_ALERT\_1\_A \_geom\_bond\_atom\_site\_label\_2 is missing  
Label identifying the atom site 2.

GEOM003\_ALERT\_1\_A \_geom\_bond\_distance is missing  
Distance between atom sites 1 and 2.

GEOM005\_ALERT\_1\_A \_geom\_angle\_atom\_site\_label\_1 is missing  
Label identifying the atom site 1.

GEOM006\_ALERT\_1\_A \_geom\_angle\_atom\_site\_label\_2 is missing  
Label identifying the atom site 2.

GEOM007\_ALERT\_1\_A \_geom\_angle\_atom\_site\_label\_3 is missing  
Label identifying the atom site 3.

ABSTY01\_ALERT\_1\_A The absorption correction should be one of the following  
\* none  
\* analytical  
\* integration  
\* numerical

```

* gaussian
* empirical
* psi-scan
* multi-scan
* refdelf
* sphere
* cylinder
PLAT029_ALERT_3_A _diffrn_measured_fraction_theta_full value Low .      0.000 Why?
PLAT044_ALERT_1_A Calculated and Reported Density Dx Differ by ..      5.8663 Check
PLAT050_ALERT_1_A Absorption Coefficient mu Not Given .....           Please Do !
PLAT086_ALERT_2_A Unsatisfactory S Value (Too Low or Not Given) ..      0.00 Check
PLAT183_ALERT_1_A Missing _cell_measurement_reflns_used Value ....     Please Do !
PLAT184_ALERT_1_A Missing _cell_measurement_theta_min Value .....     Please Do !
PLAT185_ALERT_1_A Missing _cell_measurement_theta_max Value .....     Please Do !
PLAT197_ALERT_1_A Missing _cell_measurement_temperature Datum ....     Please Add
PLAT198_ALERT_1_A Missing _diffrn_ambient_temperature Datum ....     Please Add
      Ag1      Ag2      Mo1      Mo2      O1      etc.
PLAT699_ALERT_1_A Missing _exptl_crystal_description Value .....     Please Do !
PLAT880_ALERT_1_A No datum for _diffrn_reflns_number supplied ....     Please Do !
PLAT881_ALERT_1_A No Datum for _diffrn_reflns_av_R_equivalents ...     Please Do !

```

---

**Alert level B**

```

PLAT025_ALERT_1_B Hmin..lmax Data Incomplete or Missing .....           Please Check

```

---

**Alert level C**

```

ABSTY02_ALERT_1_C An _exptl_absorpt_correction_type has been given without
      a literature citation. This should be contained in the
      _exptl_absorpt_process_details field.
      Absorption correction given as Not Given
PLAT125_ALERT_4_C No '_symmetry_space_group_name_Hall' Given .....     Please Do !

```

---

**Alert level G**

```

PLAT004_ALERT_5_G Polymeric Structure Found with Maximum Dimension      3 Info
PLAT005_ALERT_5_G No Embedded Refinement Details Found in the CIF      Please Do !
PLAT794_ALERT_5_G Tentative Bond Valency for Ag1 (I) .                  1.08 Info
PLAT794_ALERT_5_G Tentative Bond Valency for Ag2 (I) .                  1.10 Info
PLAT794_ALERT_5_G Tentative Bond Valency for Mo1 (VI) .                 6.03 Info
PLAT794_ALERT_5_G Tentative Bond Valency for Mo2 (VI) .                 5.95 Info
PLAT808_ALERT_5_G No Parseable SHELXL Style Weighting Scheme Found      Please Check
PLAT882_ALERT_1_G No Datum for _diffrn_reflns_av_unetI/netI .....     Please Do !
PLAT883_ALERT_1_G No Info/Value for _atom_sites_solution_primary .      Please Do !
PLAT980_ALERT_1_G No Anomalous Scattering Factors Found in CIF ...     Please Check

```

---

57 **ALERT level A** = Most likely a serious problem - resolve or explain  
 1 **ALERT level B** = A potentially serious problem, consider carefully  
 2 **ALERT level C** = Check. Ensure it is not caused by an omission or oversight  
 10 **ALERT level G** = General information/check it is not something unexpected

60 ALERT type 1 CIF construction/syntax error, inconsistent or missing data  
 1 ALERT type 2 Indicator that the structure model may be wrong or deficient  
 1 ALERT type 3 Indicator that the structure quality may be low  
 1 ALERT type 4 Improvement, methodology, query or suggestion  
 7 ALERT type 5 Informative message, check

---

## checkCIF publication errors

---

### Alert level A

PUBL004\_ALERT\_1\_A The contact author's name and address are missing,  
\_publ\_contact\_author\_name and \_publ\_contact\_author\_address.

PUBL005\_ALERT\_1\_A \_publ\_contact\_author\_email, \_publ\_contact\_author\_fax and  
\_publ\_contact\_author\_phone are all missing.

At least one of these should be present.

PUBL006\_ALERT\_1\_A \_publ\_requested\_journal is missing

e.g. 'Acta Crystallographica Section C'

PUBL008\_ALERT\_1\_A \_publ\_section\_title is missing. Title of paper.

PUBL009\_ALERT\_1\_A \_publ\_author\_name is missing. List of author(s) name(s).

PUBL010\_ALERT\_1\_A \_publ\_author\_address is missing. Author(s) address(es).

PUBL012\_ALERT\_1\_A \_publ\_section\_abstract is missing.

Abstract of paper in English.

PUBL016\_ALERT\_1\_A Details of the refinement are missing.

e.g. \_publ\_section\_exptl\_refinement

\_computing\_data\_collection

\_computing\_cell\_refinement , etc.

ATOM001\_ALERT\_1\_A \_atom\_type\_scat\_source is missing

Reference to scattering factors applied.

---

### Alert level G

PUBL017\_ALERT\_1\_G The \_publ\_section\_references section is missing or  
empty.

---

9 **ALERT level A** = Data missing that is essential or data in wrong format

1 **ALERT level G** = General alerts. Data that may be required is missing

---

## Publication of your CIF

You should attempt to resolve as many as possible of the alerts in all categories. Often the minor alerts point to easily fixed oversights, errors and omissions in your CIF or refinement strategy, so attention to these fine details can be worthwhile. In order to resolve some of the more serious problems it may be necessary to carry out additional measurements or structure refinements. However, the nature of your study may justify the reported deviations from journal submission requirements and the more serious of these should be commented upon in the discussion or experimental section of a paper or in the "special\_details" fields of the CIF. *checkCIF* was carefully designed to identify outliers and unusual parameters, but every test has its limitations and alerts that are not important in a particular case may appear. Conversely, the absence of alerts does not guarantee there are no aspects of the results needing attention. It is up to the individual to critically assess their own results and, if necessary, seek expert advice.

If level A alerts remain, which you believe to be justified deviations, and you intend to submit this CIF for publication in a journal, you should additionally insert an explanation in your CIF using the Validation Reply Form (VRF) below. This will allow your explanation to be considered as part of the review process.

## Validation response form

Please find below a validation response form (VRF) that can be filled in and pasted into your CIF.

```
# start Validation Reply Form
_vrf_PUBL004_GLOBAL
;
PROBLEM: The contact author's name and address are missing,
RESPONSE: ...
;
_vrf_PUBL005_GLOBAL
;
PROBLEM: _publ_contact_author_email, _publ_contact_author_fax and
RESPONSE: ...
;
_vrf_PUBL006_GLOBAL
;
PROBLEM: _publ_requested_journal is missing
RESPONSE: ...
;
_vrf_PUBL008_GLOBAL
;
PROBLEM: _publ_section_title is missing. Title of paper.
RESPONSE: ...
;
_vrf_PUBL009_GLOBAL
;
PROBLEM: _publ_author_name is missing. List of author(s) name(s).
RESPONSE: ...
;
_vrf_PUBL010_GLOBAL
;
PROBLEM: _publ_author_address is missing. Author(s) address(es).
```

RESPONSE: ...  
;  
\_vrf\_PUBL012\_GLOBAL  
;  
PROBLEM: \_publ\_section\_abstract is missing.  
RESPONSE: ...  
;  
\_vrf\_PUBL016\_GLOBAL  
;  
PROBLEM: Details of the refinement are missing.  
RESPONSE: ...  
;  
\_vrf\_ATOM001\_GLOBAL  
;  
PROBLEM: \_atom\_type\_scatter\_source is missing  
RESPONSE: ...  
;  
\_vrf\_EXPT001\_I  
;  
PROBLEM: \_expt1\_crystal\_density\_diffraction is missing  
RESPONSE: ...  
;  
\_vrf\_DIFF001\_I  
;  
PROBLEM: \_diffraction\_radiation\_type is missing  
RESPONSE: ...  
;  
\_vrf\_DIFF002\_I  
;  
PROBLEM: \_diffraction\_radiation\_wavelength is missing  
RESPONSE: ...  
;  
\_vrf\_CELL003\_I  
;  
PROBLEM: \_cell\_measurement\_reflections\_used is missing  
RESPONSE: ...  
;  
\_vrf\_CELL004\_I  
;  
PROBLEM: \_cell\_measurement\_theta\_min is missing  
RESPONSE: ...  
;  
\_vrf\_CELL005\_I  
;  
PROBLEM: \_cell\_measurement\_theta\_max is missing  
RESPONSE: ...  
;  
\_vrf\_CELL006\_I  
;  
PROBLEM: \_cell\_measurement\_temperature is missing  
RESPONSE: ...  
;  
\_vrf\_EXPT004\_I  
;  
PROBLEM: \_expt1\_absorption\_coefficient\_mu is missing  
RESPONSE: ...  
;



```
_vrf_EXPT005_I
;
PROBLEM: _exptl_crystal_description is missing
RESPONSE: ...
;
_vrf_EXPT009_I
;
PROBLEM: No crystal dimensions have been given.
RESPONSE: ...
;
_vrf_EXPT010_I
;
PROBLEM: _exptl_crystal_colour (_pd_char_colour for powder) is missing
RESPONSE: ...
;
_vrf_DIFF003_I
;
PROBLEM: _diffrn_measurement_device_type is missing
RESPONSE: ...
;
_vrf_DIFF005_I
;
PROBLEM: _diffrn_measurement_method is missing
RESPONSE: ...
;
_vrf_DIFF007_I
;
PROBLEM: _diffrn_reflns_number is missing
RESPONSE: ...
;
_vrf_REFL001_I
;
PROBLEM: _reflns_number_total is missing
RESPONSE: ...
;
_vrf_REFL002_I
;
PROBLEM: _reflns_number_gt is missing
RESPONSE: ...
;
_vrf_REFL004_I
;
PROBLEM: _reflns_threshold_expression is missing
RESPONSE: ...
;
_vrf_DIFF008_I
;
PROBLEM: _diffrn_reflns_theta_max is missing
RESPONSE: ...
;
_vrf_DIFF013_I
;
PROBLEM: _diffrn_reflns_limit_h_min is missing
RESPONSE: ...
;
_vrf_DIFF014_I
;
```

PROBLEM: \_diffrn\_reflms\_limit\_h\_max is missing  
RESPONSE: ...  
;  
\_vrf\_DIFF015\_I  
;  
PROBLEM: \_diffrn\_reflms\_limit\_k\_min is missing  
RESPONSE: ...  
;  
\_vrf\_DIFF016\_I  
;  
PROBLEM: \_diffrn\_reflms\_limit\_k\_max is missing  
RESPONSE: ...  
;  
\_vrf\_DIFF017\_I  
;  
PROBLEM: \_diffrn\_reflms\_limit\_l\_min is missing  
RESPONSE: ...  
;  
\_vrf\_DIFF018\_I  
;  
PROBLEM: \_diffrn\_reflms\_limit\_l\_max is missing  
RESPONSE: ...  
;  
\_vrf\_DIFF019\_I  
;  
PROBLEM: \_diffrn\_standards\_number is missing  
RESPONSE: ...  
;  
\_vrf\_DIFF020\_I  
;  
PROBLEM: \_diffrn\_standards\_interval\_count and  
RESPONSE: ...  
;  
\_vrf\_DIFF022\_I  
;  
PROBLEM: \_diffrn\_standards\_decay\_% is missing  
RESPONSE: ...  
;  
\_vrf\_REFI001\_I  
;  
PROBLEM: \_refine\_ls\_structure\_factor\_coef is missing  
RESPONSE: ...  
;  
\_vrf\_REFI003\_I  
;  
PROBLEM: \_refine\_ls\_R\_factor\_gt is missing  
RESPONSE: ...  
;  
\_vrf\_REFI005\_I  
;  
PROBLEM: \_refine\_ls\_wR\_factor\_ref is missing  
RESPONSE: ...  
;  
\_vrf\_REFI007\_I  
;  
PROBLEM: \_refine\_ls\_goodness\_of\_fit\_ref is missing  
RESPONSE: ...

```
;
_vrf_REFI009_I
;
PROBLEM: _refine_ls_number_reflns is missing
RESPONSE: ...
;
_vrf_REFI010_I
;
PROBLEM: _refine_ls_number_parameters is missing
RESPONSE: ...
;
_vrf_REFI011_I
;
PROBLEM: _refine_ls_weighting_scheme is missing
RESPONSE: ...
;
_vrf_REFI015_I
;
PROBLEM: _refine_ls_shift/su_max is missing
RESPONSE: ...
;
_vrf_REFI017_I
;
PROBLEM: _refine_diff_density_max is missing
RESPONSE: ...
;
_vrf_REFI018_I
;
PROBLEM: _refine_diff_density_min is missing
RESPONSE: ...
;
_vrf_ATOM007_I
;
PROBLEM: _atom_site_aniso_label is missing
RESPONSE: ...
;
_vrf_GEOM001_I
;
PROBLEM: _geom_bond_atom_site_label_1 is missing
RESPONSE: ...
;
_vrf_GEOM002_I
;
PROBLEM: _geom_bond_atom_site_label_2 is missing
RESPONSE: ...
;
_vrf_GEOM003_I
;
PROBLEM: _geom_bond_distance is missing
RESPONSE: ...
;
_vrf_GEOM005_I
;
PROBLEM: _geom_angle_atom_site_label_1 is missing
RESPONSE: ...
;
_vrf_GEOM006_I
```

```

;
PROBLEM: _geom_angle_atom_site_label_2 is missing
RESPONSE: ...
;
_vrf_GEOM007_I
;
PROBLEM: _geom_angle_atom_site_label_3 is missing
RESPONSE: ...
;
_vrf_ABSTY01_I
;
PROBLEM: The absorption correction should be one of the following
RESPONSE: ...
;
_vrf_PLAT029_I
;
PROBLEM: _diffn_measured_fraction_theta_full value Low .      0.000 Why?
RESPONSE: ...
;
_vrf_PLAT044_I
;
PROBLEM: Calculated and Reported Density Dx Differ by ..      5.8663 Check
RESPONSE: ...
;
_vrf_PLAT050_I
;
PROBLEM: Absorption Coefficient mu Not Given .....           Please Do !
RESPONSE: ...
;
_vrf_PLAT086_I
;
PROBLEM: Unsatisfactory S Value (Too Low or Not Given) ..      0.00 Check
RESPONSE: ...
;
_vrf_PLAT183_I
;
PROBLEM: Missing _cell_measurement_reflms_used Value ....     Please Do !
RESPONSE: ...
;
_vrf_PLAT184_I
;
PROBLEM: Missing _cell_measurement_theta_min Value .....       Please Do !
RESPONSE: ...
;
_vrf_PLAT185_I
;
PROBLEM: Missing _cell_measurement_theta_max Value .....       Please Do !
RESPONSE: ...
;
_vrf_PLAT197_I
;
PROBLEM: Missing _cell_measurement_temperature Datum ....     Please Add
RESPONSE: ...
;
_vrf_PLAT198_I
;
PROBLEM: Missing _diffn_ambient_temperature Datum ....        Please Add

```

```
RESPONSE: ...
;
_vrf_PLAT699_I
;
PROBLEM: Missing _exptl_crystal_description Value ..... Please Do !
RESPONSE: ...
;
_vrf_PLAT880_I
;
PROBLEM: No datum for _diffrn_reflns_number supplied .... Please Do !
RESPONSE: ...
;
_vrf_PLAT881_I
;
PROBLEM: No Datum for _diffrn_reflns_av_R_equivalents ... Please Do !
RESPONSE: ...
;
# end Validation Reply Form
```

If you wish to submit your CIF for publication in Acta Crystallographica Section C or E, you should upload your CIF via the web. If you wish to submit your CIF for publication in IUCrData you should upload your CIF via the web. If your CIF is to form part of a submission to another IUCr journal, you will be asked, either during electronic submission or by the Co-editor handling your paper, to upload your CIF via our web site.

---

**PLATON version of 13/07/2021; check.def file version of 13/07/2021**

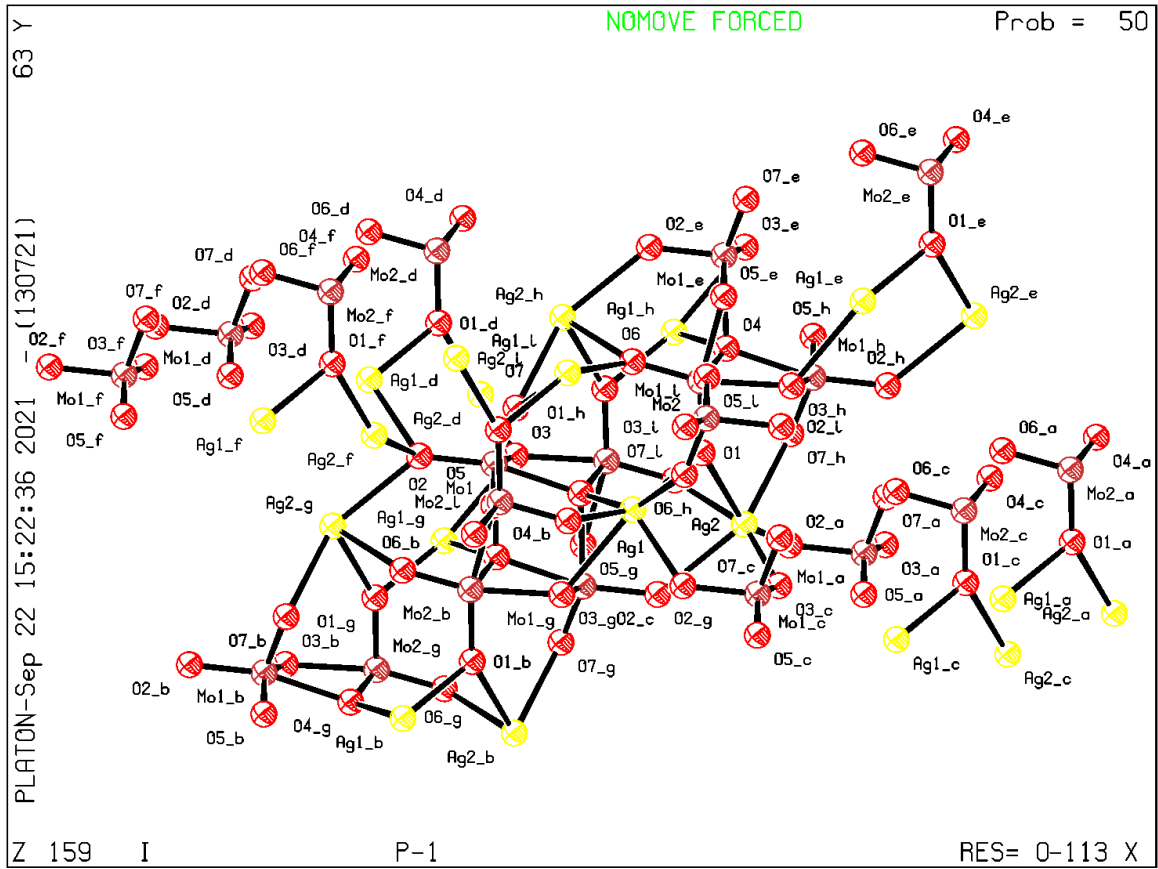

Supplement: d1ra07097e2.pdf [file d1ra07097e2.pdf]
