# Supplementary material for: Ag2Mo2O7: an oxide solid-state Ag+ electrolyte
Source: Royal Society of Chemistry journal article supplement (doi:10.1039/d1ra07097e), 2022-01-01
Supplement: d1ra07097e3.pdf [file d1ra07097e3.pdf]

Supporting information (SI)

## Ag<sub>2</sub>Mo<sub>2</sub>O<sub>7</sub>: an oxide solid-state Ag<sup>+</sup> electrolyte

Weixin Yan<sup>1</sup>, Dongmei Zhu<sup>1</sup>, Zhaofeng Wang<sup>1</sup>, Yunhao Xia<sup>1</sup>, Dong-Yun Gui<sup>2</sup>, Fa Luo<sup>1</sup>, Chun-Hai Wang<sup>1,3,\*</sup>

<sup>1</sup> State Key Laboratory of Solidification Processing, Northwestern Polytechnical University, Xi'an, Shaanxi 710072, China

<sup>2</sup> Institute of Functional Materials, College of Materials Science and Engineering, Xi'an University of Architecture and Technology, Xi'an, Shaanxi 710055, China

<sup>3</sup> School of Chemistry, The University of Sydney, Sydney NSW 2006, Australia

Table S1 Raman modes of Ag<sub>2</sub>Mo<sub>2</sub>O<sub>7</sub>

| mode         | Experimental                          |                                           |                          | Theoretical (DFT)                      |                                            |
|--------------|---------------------------------------|-------------------------------------------|--------------------------|----------------------------------------|--------------------------------------------|
|              | $f_{\text{exp.}}$ (cm <sup>-1</sup> ) | $I_{\text{exp.}}$ <sup>a</sup> (Arb.Unit) | FWHM (cm <sup>-1</sup> ) | $f_{\text{theo.}}$ (cm <sup>-1</sup> ) | $I_{\text{theo.}}$ <sup>a</sup> (Arb.Unit) |
| $A_g^{(1)}$  | -                                     | -                                         | -                        | 32.00                                  | 0.00152                                    |
| $A_g^{(2)}$  | -                                     | -                                         | -                        | 40.91                                  | 0.00266                                    |
| $A_g^{(3)}$  | -                                     | -                                         | -                        | 46.49                                  | 0.00146                                    |
| $A_g^{(4)}$  | -                                     | -                                         | -                        | 54.34                                  | 3.61E-4                                    |
| $A_g^{(5)}$  | -                                     | -                                         | -                        | 74.93                                  | 0.00176                                    |
| $A_g^{(6)}$  | -                                     | -                                         | -                        | 84.11                                  | 0.00169                                    |
| $A_g^{(7)}$  | 101.9                                 | 0.0779                                    | 10.1                     | 102.81                                 | 0.00192                                    |
| $A_g^{(8)}$  | 116.4                                 | 0.0022                                    | 9.7                      | 114.11                                 | 0.00352                                    |
| $A_g^{(9)}$  | -                                     | -                                         | -                        | 140.20                                 | 0.00121                                    |
| $A_g^{(10)}$ | 148.4                                 | 0.0135                                    | 16.0                     | 142.71                                 | 0.00102                                    |
| $A_g^{(11)}$ | 159.9                                 | 0.0759                                    | 12.2                     | 154.86                                 | 0.00159                                    |
| $A_g^{(12)}$ | -                                     | -                                         | -                        | 173.03                                 | 0.00401                                    |
| $A_g^{(13)}$ | 187.8                                 | 0.0488                                    | 14.3                     | 191.65                                 | 0.00311                                    |
| $A_g^{(14)}$ | -                                     | -                                         | -                        | 213.04                                 | 0.00234                                    |
| $A_g^{(15)}$ | 224.9                                 | 0.0488                                    | 16.4                     | 224.52                                 | 0.00951                                    |
| $A_g^{(16)}$ | 246.1                                 | 0.0385                                    | 13.3                     | 242.64                                 | 0.00131                                    |
| $A_g^{(17)}$ | 256.6                                 | 0.0508                                    | 16.5                     | 262.72                                 | 0.02149                                    |
| $A_g^{(18)}$ | 299.9                                 | 0.0355                                    | 15.1                     | 303.12                                 | 0.02709                                    |
| $A_g^{(19)}$ | 315.5                                 | 0.0574                                    | 14.0                     | 304.17                                 | 0.03328                                    |
| $A_g^{(20)}$ | 340.1                                 | 0.0111                                    | 14.3                     | 328.57                                 | 0.01462                                    |
| $A_g^{(21)}$ | 347.9                                 | 0.0481                                    | 10.3                     | 333.57                                 | 0.01022                                    |
| $A_g^{(22)}$ | 370.1                                 | 0.0060                                    | 14.4                     | 347.75                                 | 0.01038                                    |
| $A_g^{(23)}$ | 391.2                                 | 0.0069                                    | 14.2                     | 372.88                                 | 0.00481                                    |
| $A_g^{(24)}$ | 408.2                                 | 0                                         | 16.1                     | 397.09                                 | 0.00661                                    |
| $A_g^{(25)}$ | 470.2                                 | 0.0202                                    | 15.6                     | 441.79                                 | 0.02214                                    |
| $A_g^{(26)}$ | 501.0                                 | 0.0152                                    | 17.5                     | 471.01                                 | 0.04616                                    |
| $A_g^{(27)}$ | 602.6                                 | 0.0184                                    | 16.8                     | 575.85                                 | 0.01423                                    |
| $A_g^{(28)}$ | 664.2                                 | 0.1265                                    | 18.1                     | 637.86                                 | 0.40601                                    |
| $A_g^{(29)}$ | 732.0                                 | 0.0049                                    | 15.5                     | 700.77                                 | 0.01021                                    |
| $A_g^{(30)}$ | 826.7                                 | 0.1931                                    | 8.5                      | 800.85                                 | 0.02425                                    |
| $A_g^{(31)}$ | 833.8                                 | 0.3403                                    | 7.9                      | 806.87                                 | 1.00000                                    |
| $A_g^{(32)}$ | 886.1                                 | 0.1537                                    | 9.7                      | 867.76                                 | 0.52889                                    |
| $A_g^{(33)}$ | 915.7                                 | 1.0000                                    | 7.2                      | 914.79                                 | 0.70337                                    |

<sup>a</sup>: Intensity are normalized

\* Corresponding author, email: chwang81@gmail.com

Table S2 Eigenfrequency of infrared active vibrational modes of  $\text{Ag}_2\text{Mo}_2\text{O}_7$  from the DFT calculations

| No | Mode         | $f_{\text{theo}}$<br>( $\text{cm}^{-1}$ ) | Intensity<br>( $\text{km/mol}$ ) | No | Mode         | $f_{\text{theo}}$<br>( $\text{cm}^{-1}$ ) | Intensity<br>( $\text{km/mol}$ ) |
|----|--------------|-------------------------------------------|----------------------------------|----|--------------|-------------------------------------------|----------------------------------|
| 1  | $A_u^{(1)}$  | 38.75                                     | 1.07                             | 16 | $A_u^{(16)}$ | 306.14                                    | 5.12                             |
| 2  | $A_u^{(2)}$  | 54.05                                     | 1.67                             | 17 | $A_u^{(17)}$ | 324.64                                    | 3.89                             |
| 3  | $A_u^{(3)}$  | 60.89                                     | 2.68                             | 18 | $A_u^{(18)}$ | 335.17                                    | 10.81                            |
| 4  | $A_u^{(4)}$  | 91.17                                     | 0.79                             | 19 | $A_u^{(19)}$ | 351.41                                    | 18.44                            |
| 5  | $A_u^{(5)}$  | 98.38                                     | 1.23                             | 20 | $A_u^{(20)}$ | 361.13                                    | 8.88                             |
| 6  | $A_u^{(6)}$  | 113.83                                    | 1.82                             | 21 | $A_u^{(21)}$ | 386.71                                    | 16.57                            |
| 7  | $A_u^{(7)}$  | 126.84                                    | 1.21                             | 22 | $A_u^{(22)}$ | 398.45                                    | 10.38                            |
| 8  | $A_u^{(8)}$  | 141.51                                    | 0.99                             | 23 | $A_u^{(23)}$ | 437.13                                    | 1.33                             |
| 9  | $A_u^{(9)}$  | 168.75                                    | 1.23                             | 24 | $A_u^{(24)}$ | 535.02                                    | 141.23                           |
| 10 | $A_u^{(10)}$ | 195.51                                    | 0.22                             | 25 | $A_u^{(25)}$ | 649.70                                    | 33.87                            |
| 11 | $A_u^{(11)}$ | 202.21                                    | 0.66                             | 26 | $A_u^{(26)}$ | 697.18                                    | 52.98                            |
| 12 | $A_u^{(12)}$ | 213.20                                    | 22.62                            | 27 | $A_u^{(27)}$ | 795.65                                    | 40.13                            |
| 13 | $A_u^{(13)}$ | 242.56                                    | 1.87                             | 28 | $A_u^{(28)}$ | 817.39                                    | 12.07                            |
| 14 | $A_u^{(14)}$ | 254.11                                    | 7.58                             | 29 | $A_u^{(29)}$ | 865.84                                    | 24.67                            |
| 15 | $A_u^{(15)}$ | 291.78                                    | 25.84                            | 30 | $A_u^{(30)}$ | 905.88                                    | 27.04                            |

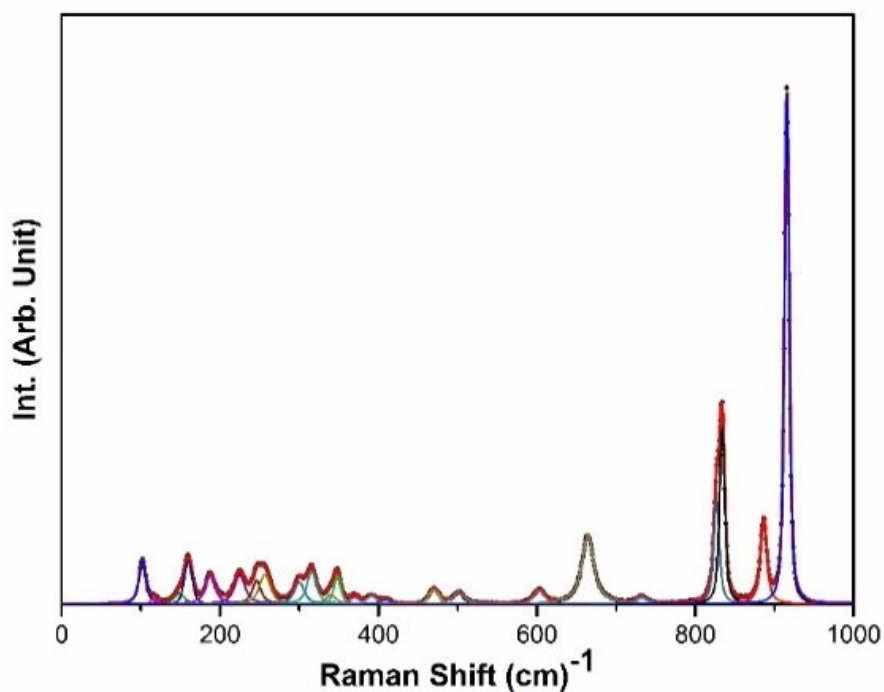

Fig. S1. Raman spectra of  $\text{Ag}_2\text{Mo}_2\text{O}_7$  with fitted peaks.

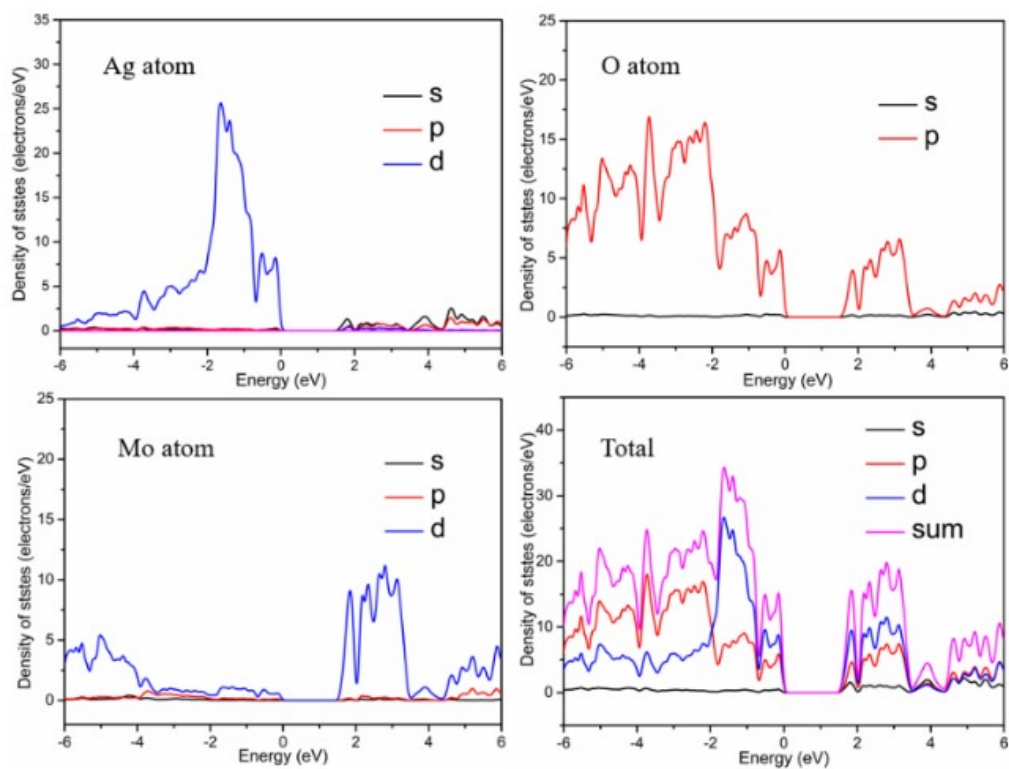

Fig. S2 Partial density of state (PDOS) of different atoms and total DOS in  $\text{Ag}_2\text{Mo}_2\text{O}_7$ . The Fermi level is set as  $E_{\text{Fermi}} = 0$  eV.

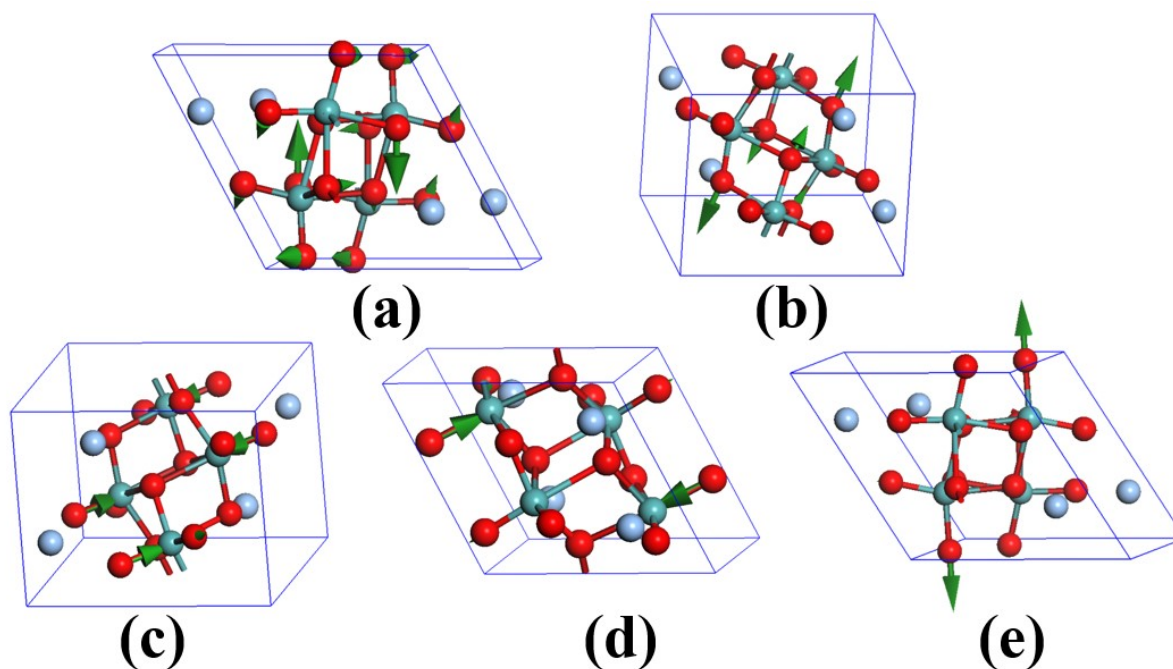

Fig. S3. The vibration detail (vector of atomic motions) of five Raman vibrational modes with high intensities (a)  $A_g^{(19)}$  ( $304.17 \text{ cm}^{-1}$ ), (b)  $A_g^{(28)}$  ( $637.86 \text{ cm}^{-1}$ ), (c)  $A_g^{(31)}$  ( $806.87 \text{ cm}^{-1}$ ), (d)  $A_g^{(32)}$  ( $867.76 \text{ cm}^{-1}$ ), (e)  $A_g^{(32)}$  ( $914.79 \text{ cm}^{-1}$ ).

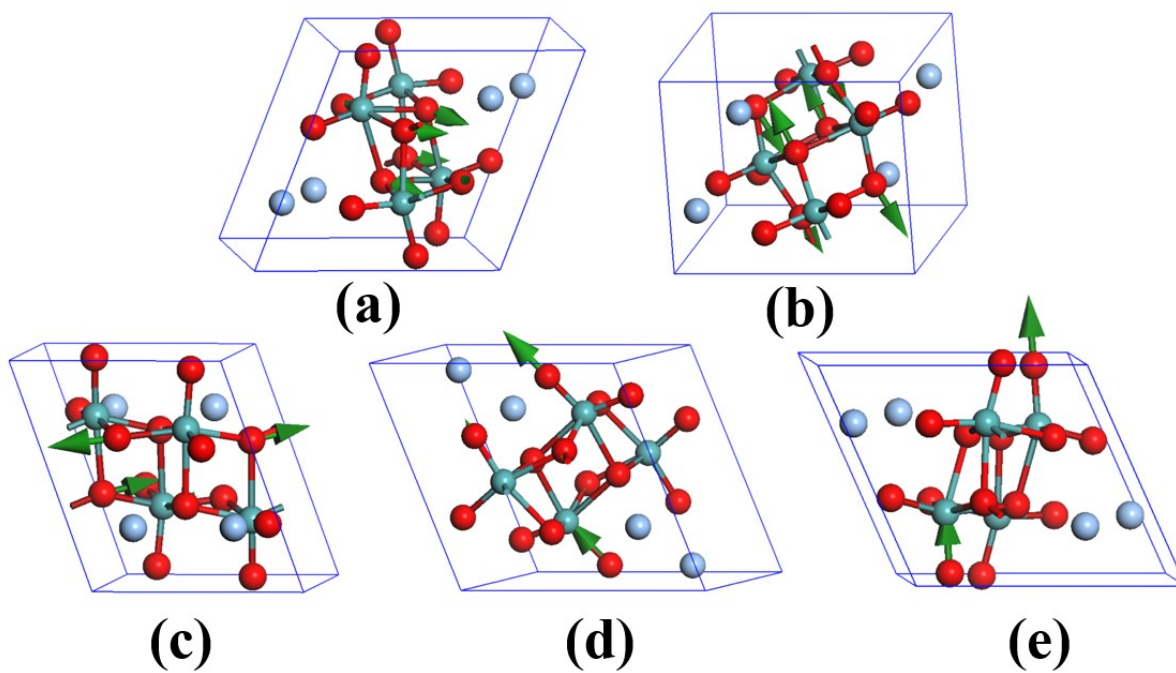

Fig. S4. The vibration detail (vector of atomic motions) of five IR vibrational modes with high intensities  
 (a)  $A_u^{(24)}$  ( $535.02\text{ cm}^{-1}$ ), (b)  $A_u^{(25)}$  ( $649.70\text{ cm}^{-1}$ ), (c)  $A_u^{(26)}$  ( $697.18\text{ cm}^{-1}$ ), (d)  $A_u^{(27)}$  ( $795.65\text{ cm}^{-1}$ ), (e)  $A_u^{(30)}$  ( $905.88\text{ cm}^{-1}$ ).
